# Supplementary material for: Microfiltration process for surface water treatment: irreversible fouling identification and chemical cleaning
Source: Royal Society of Chemistry journal article supplement (doi:10.1039/c6ra18284d), 2016-01-01
Supplement: c6ra18284d1.pdf [file c6ra18284d1.pdf]

# 1 Supplementary material-

## 2 Microfiltration process for surface water treatment: Irreversible 3 fouling identification and chemical cleaning

4

### 5 List of supplementary material

| Title of Figures                                                                   |
|------------------------------------------------------------------------------------|
| <b>Fig. S1-S9</b>                                                                  |
| Fig. S1. Schematic diagram of the MF set-up                                        |
| Fig. S2. Removal of COD <sub>Mn</sub> (a) and UV254 (b) by hybrid membrane process |
| Fig. S3. TMP variations with operating time extension                              |
| Fig. S4. MW distribution of raw, pretreated and filtrated waters                   |
| Fig. S5. MW distribution of extracted foulants                                     |
| Fig. S6. MW component percentage of SHA and NEU fractions in extracted foulants    |
| Fig. S7. PS (a) and PN (b) contents of each fraction in cleaning solutions         |
| Fig. S8. Fractions of different waters fractionated by adsorbent resins            |
| Fig. S9. Components of different waters determined by LC-OCD with peak-fitting     |

**Fig. S1-S9**

Fig. S1. Schematic diagram of the MF set-up

Fig. S2. Removal of COD<sub>Mn</sub> (a) and UV254 (b) by hybrid membrane process

Fig. S3. TMP variations with operating time extension

Fig. S4. MW distribution of raw, pretreated and filtrated waters

Fig. S5. MW distribution of extracted foulants

Fig. S6. MW component percentage of SHA and NEU fractions in extracted foulants

Fig. S7. PS (a) and PN (b) contents of each fraction in cleaning solutions

Fig. S8. Fractions of different waters fractionated by adsorbent resins

Fig. S9. Components of different waters determined by LC-OCD with peak-fitting

6

7

8

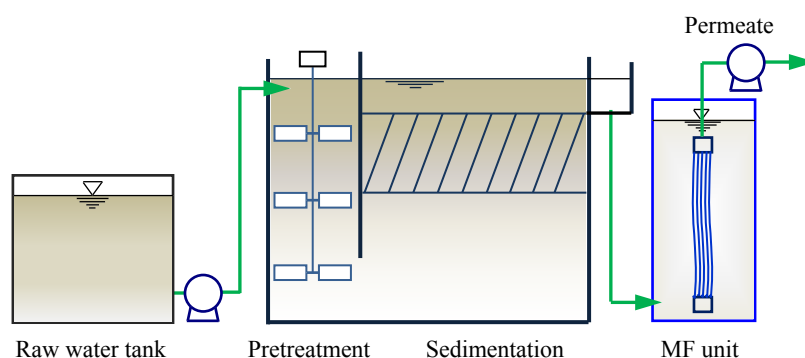

9

10 **Fig. S1. Schematic diagram of the MF set-up**

11

12

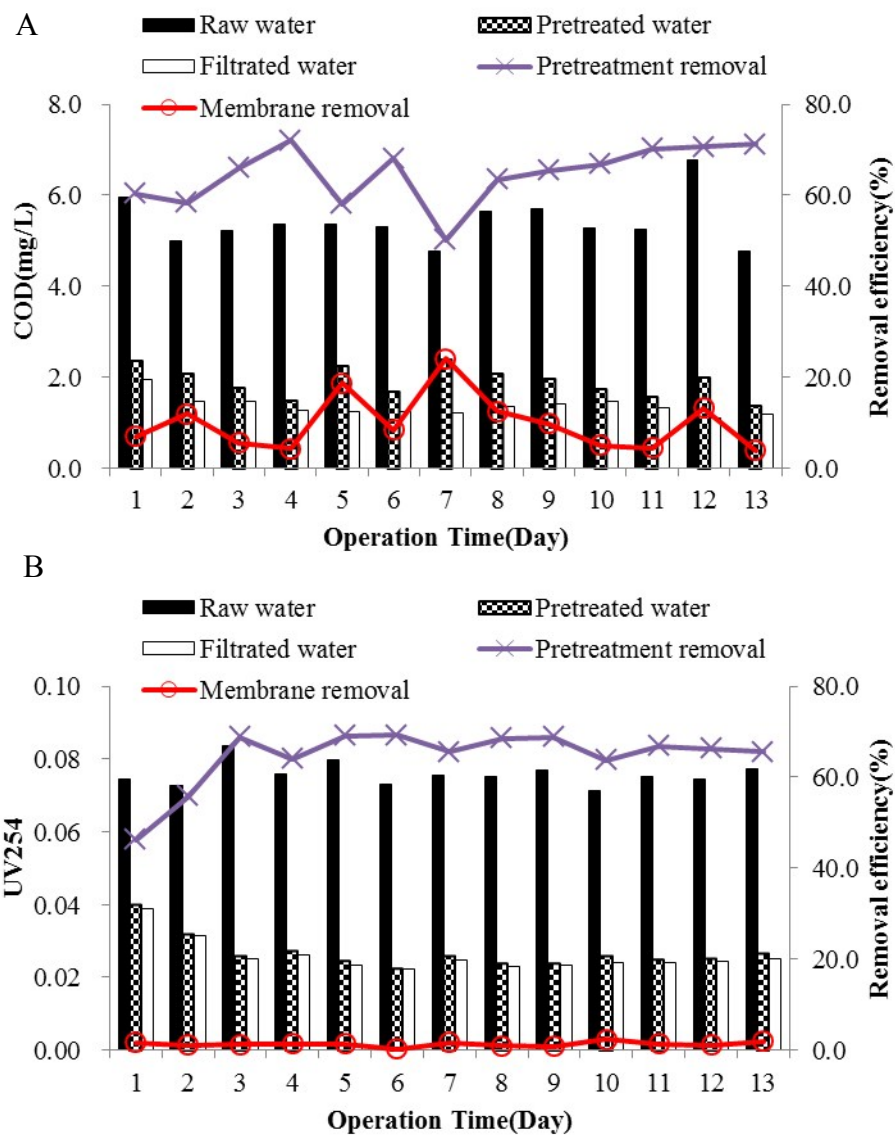

1

2 **Fig. S2. Removal of COD<sub>Mn</sub> (a) and UV254 (b) by hybrid membrane process**

3

4

5

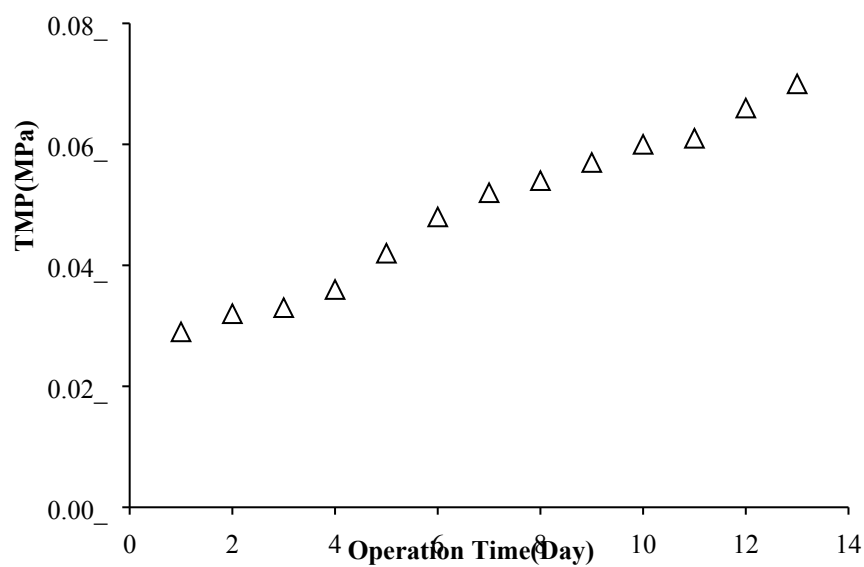

**Fig. S3. TMP changes with operating time extension**

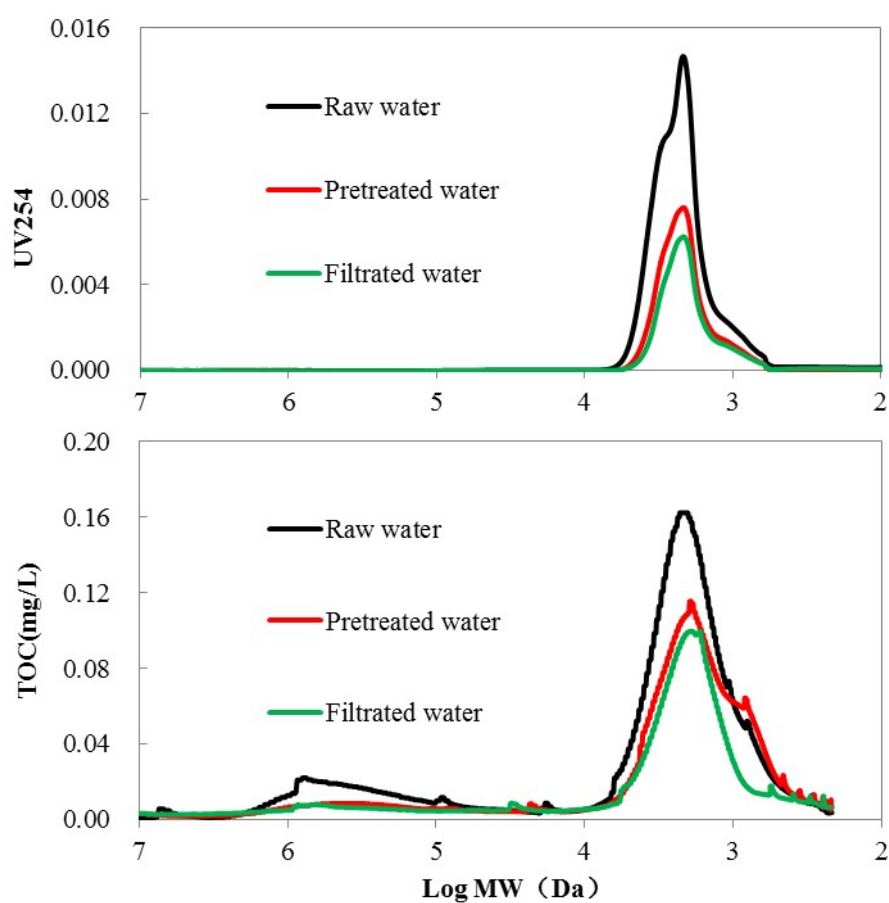

**Fig. S4. MW distribution of raw, pretreated and filtrated waters**

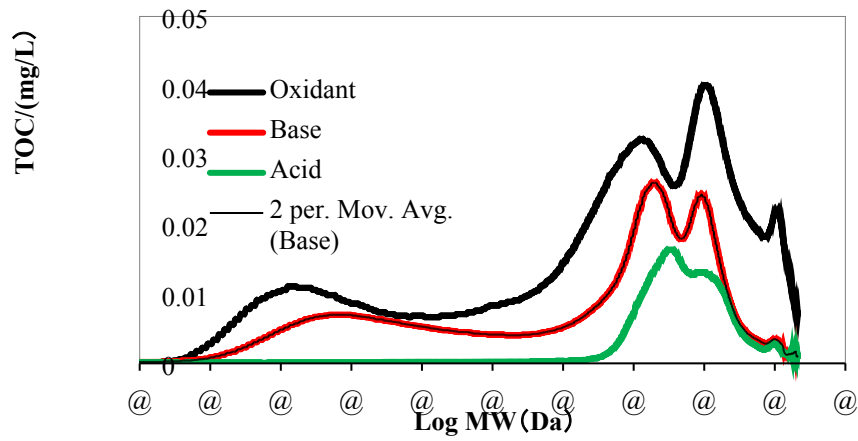

Fig. S5. MW distribution of extracted foulants

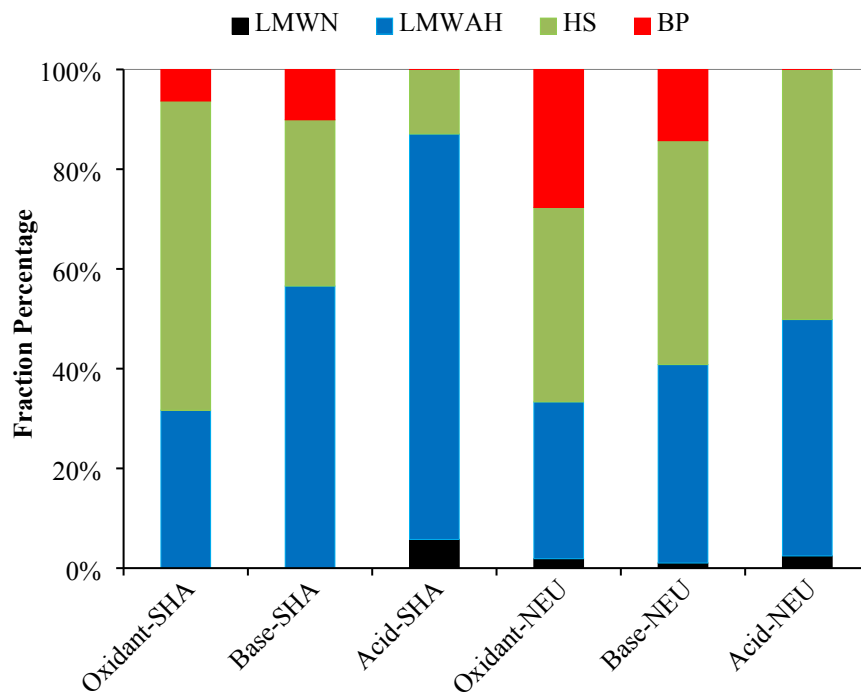

Fig. S6. MW component percentage of SHA and NEU fractions in extracted foulants

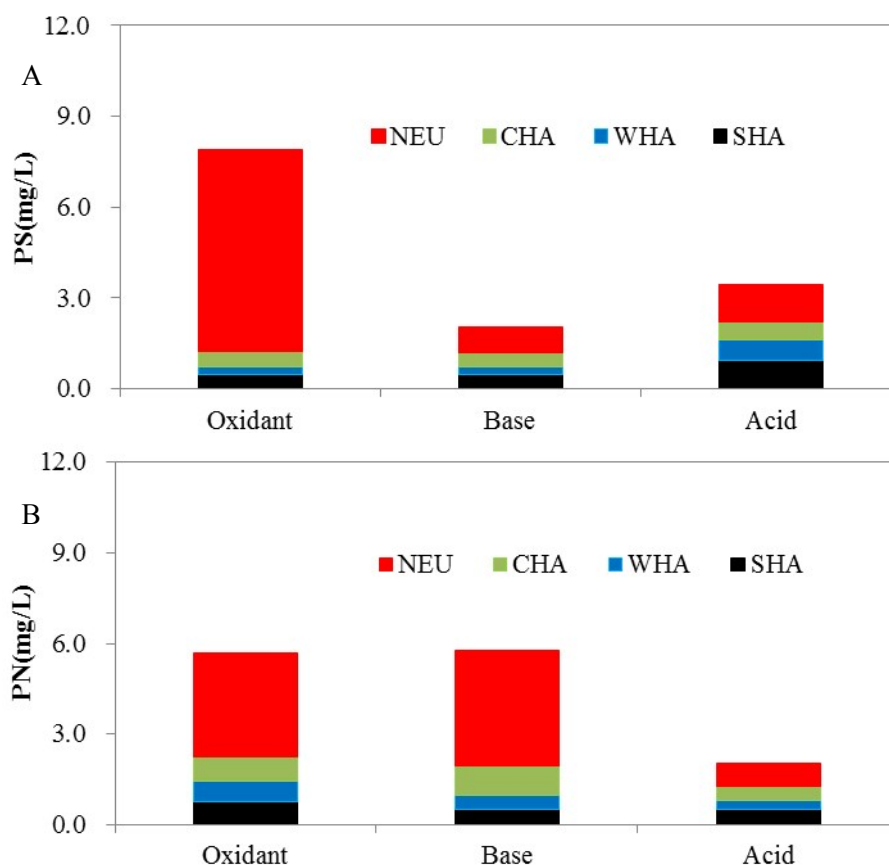

**Fig. S7. PS (a) and PN (b) contents of each fraction in cleaning solutions**

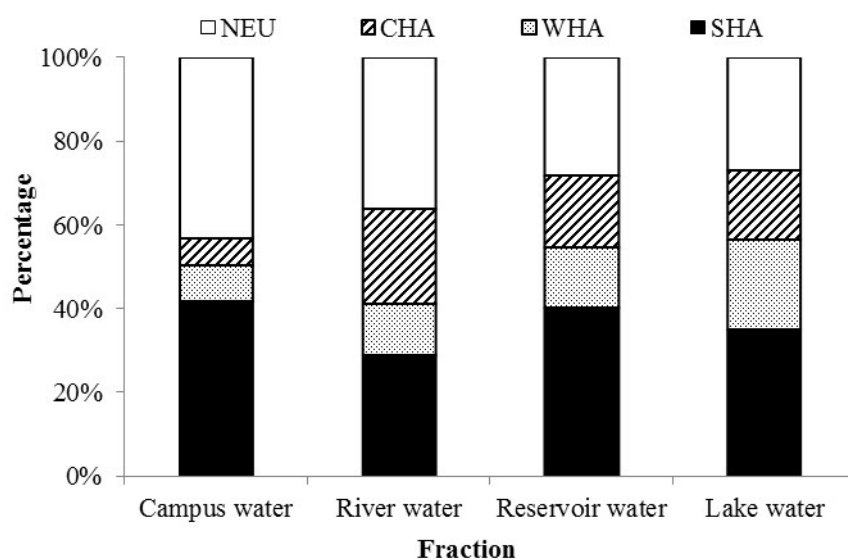

**Fig. S8. Fractions of different waters fractionated by adsorbent resins**

1

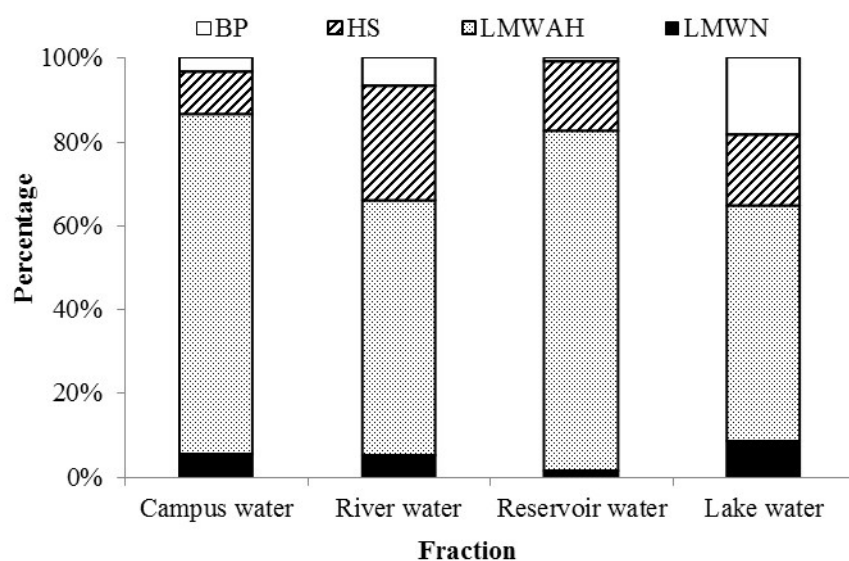

2

3 **Fig. S9. Components of different waters determined by LC-OCD with peak-**  
4 **fitting**

5

6

7

8

9

10

11

12

13

14

15

16
